# Supplementary material for: The role of lithospheric thermal structure in the development of lateral heterogeneous of the continental collision system
Source: Copernicus journal article supplement (doi:10.5194/egusphere-2023-1388), 2023-07-06
Supplement: Supplementary file [file egusphere-2023-1388-RC1-supplement.pdf]

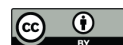

# 1 The role of lithospheric thermal structure in the development of 2 lateral heterogeneous of the continental collision system

3 Mengxue Liu<sup>1</sup>, Dinghui Yang<sup>1</sup>, Rui Qi<sup>1</sup>

4 <sup>1</sup>Department of Mathematical Sciences, Tsinghua University, Beijing 100084, China.

5 *Correspondence to:* Dinghui Yang (ydh@mail.tsinghua.edu.cn)

6 **Abstract.** Continental collision is a crucial process in plate tectonics, whereas our understanding regarding the tectonic  
7 complexities at such convergent plate boundary remains largely unclear in terms of the evolution and the controlling  
8 parameters of its lateral heterogeneity. In this study, we conducted a series of two-dimensional numerical experiments to  
9 investigate how continental lithospheric thermal structure influences the development of lateral heterogeneity along the  
10 continental collision zone. Two end members were achieved: 1) Continuous subduction mode, which prevails when the  
11 model has a cold procontinental moho ( $T_{\text{moho}} \leq 450 \text{ }^\circ\text{C}$ ). In this case, a narrow collision orogen develops, and the  
12 subducting angle steepens with the increasing retrocontinental  $T_{\text{moho}}$ . 2) Continental subduction with a slab break-off,  
13 which generates a relative wide collision orogen, and dominates when the model has a relative hot procontinental  $T_{\text{moho}}$  ( $\geq$   
14  $500 \text{ }^\circ\text{C}$ ), especially when the  $T_{\text{moho}} \geq 550 \text{ }^\circ\text{C}$ . ~~In contrast,~~  $H_r$  is the second-order controlling parameter in varying the  
15 continental collision mode, while it prefers to enhance strain localization in the upper part of the continental lithosphere and  
16 promote the growth of shear zones there. By comparing the model results with geoscience observations, we suggest that the  
17 discrepant evolutionary paths from the continuous subduction underlying the Hindu Kush to the continental subduction after  
18 slab break-off beneath eastern Tibet may originate from the inherited lateral inhomogeneity of Indian lithospheric thermal  
19 structure. Besides, the high content of crustal radioactive elements may be one of the important factors that controls the  
20 formation of large thrust fault zones in the Himalayas.

## 21 1 Introduction

22 Continental collision following the closure of the ocean is regarded as one of the key geodynamical processes of plate  
23 tectonics (Toussaint et al., 2004), which creates the world's largest orogen (the Alpine-Himalaya orogen) and highest plateau  
24 (the Tibetan Plateau). It would be really hard to maintain a homogeneous plate morphology and the crustal-mantle  
25 deformation features during such a large-scale collision stretching thousands of kilometers. Many of the previous geoscience  
26 observations have already provided insights into the significant lateral heterogeneity of Himalayan-Tibetan orogen (Zhou  
27 and Murphy, 2005; Li et al., 2008; Chen et al., 2015). Specifically, the horizontal sliding distance and subducting angle of  
28 the Indian lithosphere vary laterally from west to east. Despite various mechanisms have been invoked, including  
29 inhomogeneous inherit lithospheric structure, variations in rock composition, characters of terrane assembly, and the

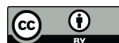

30 complex tectonic settings (Chen et al., 2016; Vogt et al., 2018; Liu and Yang, 2022), the development of the collision zone's  
31 lateral heterogeneity remains ambiguous and requires further investigations.  
32 Many of the laboratory experiments (Willingshofer and Sokoutis, 2009; Luth et al., 2010) and numerical modeling  
33 (Beaumont et al., 1994; Pysklywec, 2001; Toussaint et al., 2004; Huangfu et al., 2017; Liao and Gerya, 2017; Vogt et al.,  
34 2018; Liu et al., 2022b) have manifested that lithospheric thermal structure is one of the important controlling parameters  
35 contributing to the regulation the evolution of continental collision (Pysklywec, 2001; Faccenda et al., 2008; Ueda et al.,  
36 2012; Tang et al., 2020; Liu et al., 2022a). Pysklywec (2001) once used a series of thermomechanical models that focused on  
37 the evolutionary modes of the continental lithospheric mantle during collision. The experiments suggested that an increase in  
38 lithospheric geotherm resulted in a transition of the lithospheric mantle from an asymmetric, subduction-like mode to  
39 ablative subduction. Similarly, on the basis of two-dimensional mechanical models, Toussaint et al. (2004) investigated the  
40 potential scenarios for the evolution of continental collision. They concluded that models with a relatively low ( $< 550$  °C)  
41 moho temperature and a fast convergent rate ( $> 5$  cm/yr) are more likely to maintain stable subduction. On the contrary,  
42 among warmer and slower convergent models, lithospheric folding, pure-shear thickening, and Rayleigh-Taylor (RT)  
43 instabilities prevailed. Ghazian and Buiter (2013) used 2D numerical models to discuss the sensitivity of various collision  
44 modes to velocity, crust-mantle temperature structure, lithospheric rheology, and the density difference between the  
45 lithospheric mantle and asthenosphere. They recognized that velocity, lithospheric rheology, and temperature have important  
46 controls. More precisely, stable continental subduction evolves over a large range of values for convergent velocity and  
47 lithospheric temperature. Fast and cold models tend to fold, while slow and warm ones can generate RT-type dripping.  
48 Heron and Pysklywec (2016) subsequently presented dynamic thermomechanical experiments to explore the role of  
49 lithospheric inherited weakness in the orogenic process. According to their model results, lithospheric temperature exerts a  
50 strong control on lithospheric strength; it may influence the brittle-ductile transition depth to help determine which layer  
51 (upper crust, lower crust, or lithospheric mantle) dominantly controls the lithospheric deformation style in a collision system.  
52 Recently, Huangfu et al. (2019) employed systematic numerical simulations to study the dynamics of the lithospheric-scale  
53 subduction and crustal-scale underthrusting of the continental collision zone. They found that models with low convergence  
54 velocity and a cold upper plate are inclined to lithospheric-scale subduction, whereas models with high velocity and a hot  
55 overriding plate contribute to crustal-scale underthrusting. Though numerous numerical simulations are employed to qualify  
56 the effects of lithospheric thermal structure, it is noteworthy, however, that earlier studies consistently mainly focused on the  
57 influences of the overriding lithospheric thermal structure. Otherwise, a fairly large number of them neglected oceanic  
58 subduction prior to the continental collision for simplicity. Thus, our understanding of tectonic complexities that may emerge  
59 during progressive crust-mantle deformation at the convergent plate boundary remains largely unclear.

60 Here we present a series of high-resolution numerical experiments to gain new insights on how continental  
61 lithospheric thermal structure varies the evolutionary path of the continental collision system. Temperature heterogeneities  
62 are incorporated by altering the continental moho temperature ( $T_{\text{moho}}$ ) and crustal radioactive heat production ( $H_r$ ),

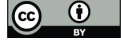

63 respectively (See Table S2 in Supporting Information for the model list). In the end, our model results are applied to draw  
 64 some parallels with the Indian-Asian collision zone.

## 65 2 Materials and Methods

### 66 2.1 Governing equation

67 We use the parallel code Advanced Solver for Problems in Earth's ConvecTion (ASPECT) (Kronbichler et al., 2012),  
 68 an extensible code of the C++ program library deal.ii (Differential Equations Analysis Library, <https://www.dealii.org/>),  
 69 targeted at the computational solution of partial differential equations using adaptive finite elements (Arndt et al., 2021), to  
 70 solve three conservation equations. The methodology is similar to our recent work (Liu and Yang, 2022; Liu et al., 2022a),  
 71 ~~and we quoted directly from these publications.~~ The models are calculated by solving the following equations of  
 72 conservation of mass, momentum, and internal energy for an incompressible medium and adopting the extended Boussinesq  
 73 approximation (van Zelst, 2022).

$$74 \quad -\nabla \cdot 2\eta \dot{\mathbf{e}}(\mathbf{u}) + \nabla p = \rho \mathbf{g} \quad \text{in } \Omega, \quad (1)$$

$$75 \quad \nabla \cdot \mathbf{u} = 0 \quad \text{in } \Omega, \quad (2)$$

$$76 \quad \rho_0 C_p \left( \frac{\partial T}{\partial t} + \mathbf{u} \cdot \nabla T \right) - \nabla \cdot k \nabla T = \rho_0 H \quad (3)$$

$$77 \quad + 2\eta \dot{\mathbf{e}}(\mathbf{u}) : \dot{\mathbf{e}}(\mathbf{u})$$

$$78 \quad + \alpha T (\mathbf{u} \cdot \nabla P) \quad \text{in } \Omega$$

$$79 \quad \frac{\partial c_i}{\partial t} + \mathbf{u} \cdot \nabla c_i = 0 \quad (4)$$

80 On the right hand-side of Eq. (3), the three terms represent the internal heat production that includes radioactive decay,  
 81 ~~friction~~ heating, and adiabatic compression of material.  $\eta$  is the viscosity,  $\dot{\mathbf{e}}(\mathbf{u}) = \frac{1}{2}(\nabla \mathbf{u} + \nabla \mathbf{u}^T)$  is the deviator of the strain  
 82 rate tensor,  $\mathbf{u}$  is the velocity,  $p$  is the pressure,  $\mathbf{g}$  is the gravitational acceleration,  $\Omega$  is the interesting domain,  $C_p$  is the heat  
 83 capacity,  $k$  is the heat conductivity,  $H$  is the intrinsic specific heat production,  $\alpha$  is the thermal expansion coefficient,  $\rho_0$  is  
 84 the adiabatic reference density.  $c_i$  named compositional fields here (e.g., upper crust, lower crust, Kronbichler et al., 2012).  
 85 As the medium was considered incompressible, we assumed that the density ( $\rho$ ) in Eq. (1) satisfied the equation:

$$86 \quad \rho = \rho_0 (1 - \alpha (T - T_0)) \quad (5)$$

87 where  $\rho_0$  is the reference density at reference temperature  $T_0$  (293 K).

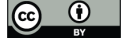

## 88 2.2 Rheology

89 Our models are based on the common assumption that solid earth materials are treated as highly viscous fluids. Thus,  
90 we apply a viscoplastic rheology (Glerum et al., 2018). The viscous regime uses a composite of diffusion and dislocation  
91 creep that can be conveniently formulated as follows: (Karato and Wu, 1993; Karato, 2008).

$$92 \quad \eta_{\text{diff/disl}} = \frac{1}{2} A_{\text{diff/disl}} \frac{1}{d^n} \frac{m}{d^n} \dot{\epsilon}_e^{\frac{l-n}{n}} \exp\left(\frac{Q_{\text{diff/disl}} + PV_{\text{diss/disl}}}{nRT}\right) \quad (6)$$

$$93 \quad \eta_{\text{comp}} = \left(\frac{1}{\eta_{\text{diff}}} + \frac{1}{\eta_{\text{disl}}}\right)^{-1} \quad (7)$$

94 where  $\dot{\epsilon}_e$  is the square root of second invariant of the deviatoric strain rate. In the case of diffusion creep,  $n = 1$ ,  $m > 0$ , while  
95 for dislocation creep  $n > 1$ ,  $m = 0$ . Definitions and values of other symbols are shown in Table S1 in Supporting Information.  
96 Surface erosion and sedimentation are neglected.

97 The plastic yielding is defined by the Drucker–Prager criterion as Eq. (8) (Davis and Selvadurai, 2002):

$$98 \quad \eta_{\text{yield}} = \frac{C \cos(\phi) + P \sin(\phi)}{2\dot{\epsilon}_e} \quad (8)$$

99 Where  $C$  is the cohesion and  $\phi$  is the initial friction angle. We also include strain weakening in the plastic regime, through  
100 which  $C$  and  $\phi$  are linearly weakened by a factor of 2 or 4 between plastic strains of 0.5 and 1.5.

101 The effective viscosity is eventually given by:

$$102 \quad \eta_{\text{eff}} = \min(\max(\eta_i, \eta_{\text{min}}), \eta_{\text{max}}) \quad (9)$$

103 where  $i$  is one of the subscripts among diff, disl, comp, and yield.  $\eta_{\text{max}}$  and  $\eta_{\text{min}}$  are user-defined viscosity cutoffs.

## 104 2.3 Initial model configuration and boundary conditions

105 The numerical model domain is 2000 km × 660 km in the horizontal and vertical directions. It contains a  
106 retrocontinental lithosphere and a procontinental lithosphere, with an oceanic lithosphere in between (Fig. 1). The  
107 continental lithosphere is 120 km thick, consists of a 25-km-thick upper crust (wet quartzite, Gleason and Tullis, 1995), a 10-  
108 km lower crust (wet anorthite, Rybacki et al., 2006), and an 85-km lithospheric mantle. The oceanic lithosphere contains a 4-  
109 km-thick sediment layer (gabbro, Wilks and Carter, 1990), an 8-km-thick oceanic crust layer (gabbro, Wilks and Carter,  
110 1990), and an 88-km-thick lithospheric mantle. Dry olivine (Hirth and Kohlstedt, 2003) is used for the mantle. All material  
111 properties are listed in Table S1. The numerical resolution incrementally increases along the depth direction from 2 km to 8  
112 km.

113 Temperature is fixed at the model surface (0°C) and the base of the lithosphere (1300°C), while various continental  
114  $T_{\text{moho}}$  is defined ranging from 450 – 600 °C. The initial continental lithospheric temperature profile follows Chapman (1986),  
115 taking into account the thickness of each lithologic layer (Eqs. (11) - (13)). The oceanic lithospheric temperature distribution

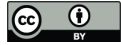

116 follows the plate cooling model (Turcotte and Schubert, 2002). Besides, a temperature gradient of 0.5 °C/km is assumed for  
 117 the sublithospheric mantle.

$$118 \quad T_Z = T_T - \frac{q_T}{k} Z - \frac{H Z^2}{2k} \quad (11)$$

$$119 \quad T_B = T_T + \frac{q_T}{k} \Delta Z - \frac{H \Delta Z^2}{2k} \quad (12)$$

$$120 \quad q_B = q_T - H \Delta Z \quad (13)$$

121  $T_Z$  is the temperature at depth  $Z$ ;  $T$  is the temperature,  $q$  is the heat flux, the subscript T and B denote the top and  
 122 bottom boundaries of each lithologic layer, respectively;  $\Delta Z$  is the layer thickness;  $H$  is the volumetric heat production;  $k$  is  
 123 the thermal conductivity.

124 We apply a free surface and free slip lower boundary, and impose a 5 cm/yr convergence rate to the trailing end of the  
 125 procontinental lithosphere. Equivalent material flows out through both side walls of the mantle domain to keep mass balance  
 126 within the whole computational domain (Fig. 1).

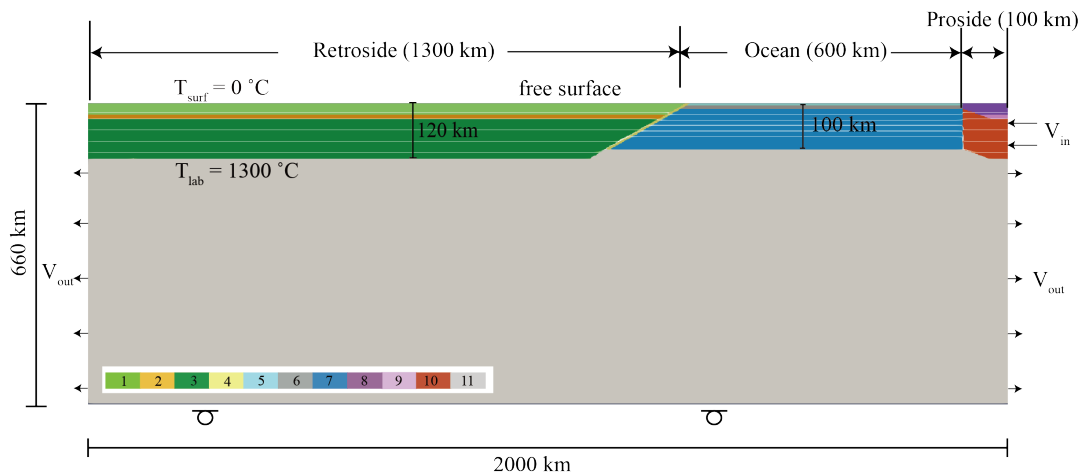

127  
 128 **Figure 1.** Reference model configuration and boundary conditions. Different colors reflect different lithologies: 1, 8,  
 129 continental upper crust; 2, 9, continental lower crust; 3, 10, continental lithospheric mantle; 4, weak zone; 5, sediment; 6,  
 130 oceanic crust; 7, oceanic lithospheric mantle; 11, sub-lithospheric mantle (Table S1). The white lines are isotherms of 200 °C  
 131 increments in the range of 200 °C to 1200 °C.  $T_{surf}$  is the surface temperature,  $T_{lab}$  is the bottom temperature of continental  
 132 lithosphere.  $V_{in}$  and  $V_{out}$  denote where material flows in and out.

### 133 3 Results

134 We conducted 48 numerical experiments by varying continental  $T_{moho}$  and crustal  $H_r$  to mimic different continental  
 135 thermal structures. Two distinct continental collision evolutionary paths were recognized: (I) continuous subduction and (II)  
 136 continental subduction with a slab break-off. All the simulations are summarized in Table S2.

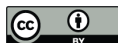

### 137 3.1 Continuous subduction without slab break-off (Mode I)

138 Figure 2 shows the development of the continuous subduction mode, it takes the Model m2 (reference model, Table  
139 S2) as an example. The model started with a relative shallow angle subduction characterized by the oceanic plate dips  
140 downward along the low-viscosity weak zone (Fig. 2a1, 3 Myr). During this stage, a portion of oceanic sediment was  
141 scraped off and stacked at shallow, accompanied by the slight uplift of the retrocontinental foreland (Fig. 2a2, 2c). As the  
142 subduction goes on, the dipping angle of the slab in depth gradually steepens under the increasing slab pull (Fig. 2a2, 9 Myr).  
143 At ~11.5 Myr (Fig. 2a3), continents collide with each other after the fully consumption of the oceanic plate. Under the  
144 continued oceanic slab pulling, the procontinental lithosphere inherited the subduction, characterized by further subducting  
145 angle steepening that resulted in the superposition of retrocontinental upper crust and oceanic sediment on the procontinental  
146 forepart. With the proceeding of procontinental subduction, the collision wedge uplifted prominently (Fig. 2c). After that, a  
147 large part of the oceanic sediment previously preserved at shallow was then entrained and subducted with the procontinental  
148 crust, followed by the rapid uplift at the retorside of the collision zone and the retoward advance of suture (Fig. 2c). From  
149 ~17.5 Myr on, the buoyant procontinental upper crust initiated to detach from the underlying lithosphere, mixed with the  
150 exhumated oceanic sediment, accumulated together in the subduction channel, and broke the neighboring retrolithospheric  
151 mantle (Figs. 2a4, 2a5). During this time, uplift within the collision zone gradually expands to the retrocontinental interior  
152 (Fig. 2c).

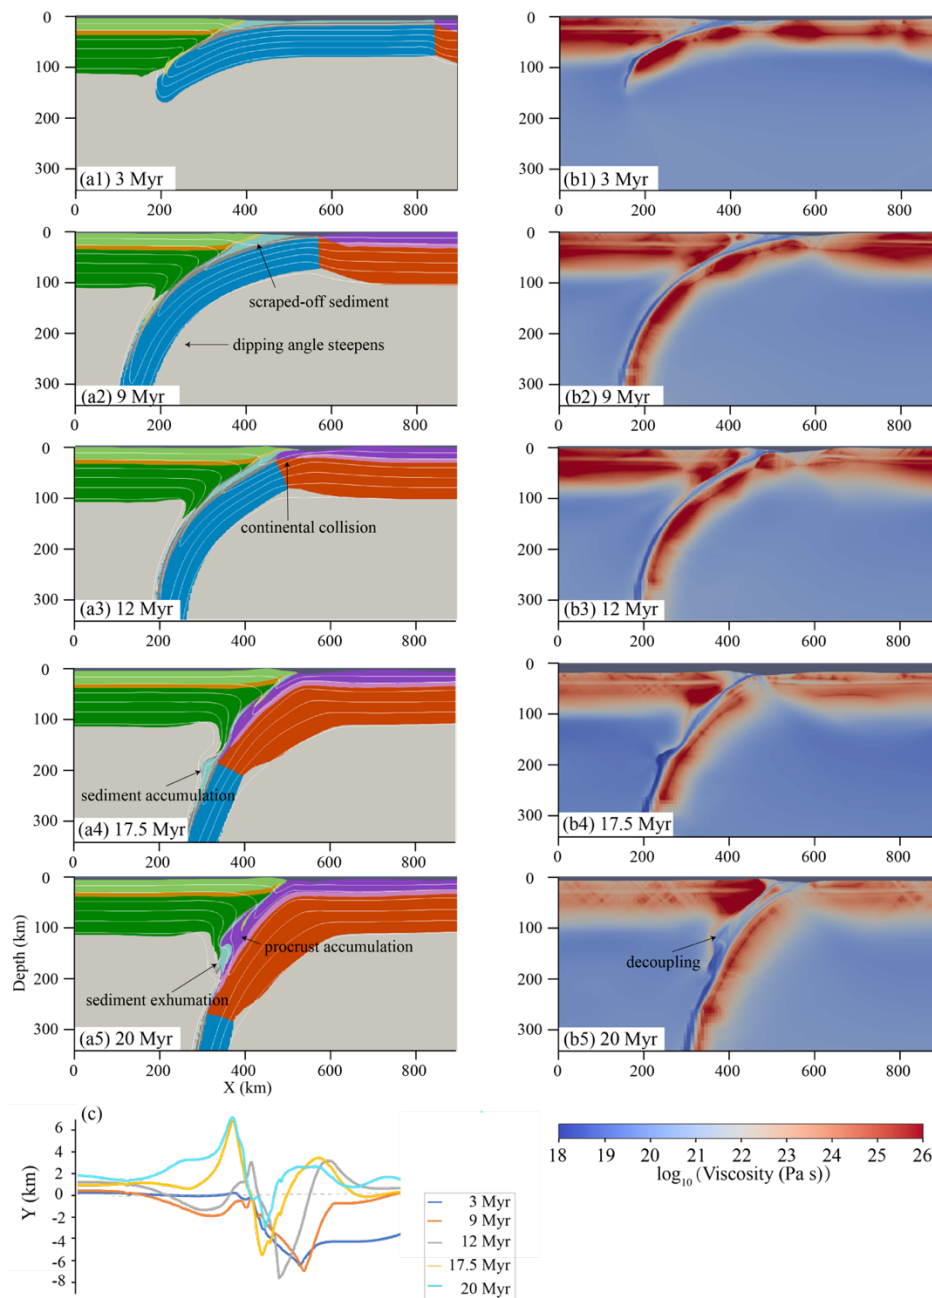

153

154 **Figure 2.** Time evolution of Model m2. Snapshots of compositional fields (a1 - a5), viscosity (b1 - b5) and topography (c)

155 for selected model times are shown. The lithologies and isotherms are the same as in Fig. 1.3 Sensitivity 3.2 Continental

156 subduction with a slab break-off (Mode II)

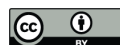

### 157 **3.2 Continental subduction with a slab break-off (Mode II)**

158 In Model m7, both the pro- and retro- continent have higher  $T_{\text{moho}}$  than Model m2 (Table S2). The lithospheric  
159 deformation behaviors and the evolution of the model during the oceanic subduction phase are quite similar to those  
160 observed in Model m2 (Fig. 3a1). The only difference is that the slab steepened more rapidly at a later stage, which gave rise  
161 to the decoupling between the retrocontinental lithosphere and the oceanic plate. Such a process created an ideal space for  
162 the asthenospheric upwelling and resulted in the significant weakening of the retrocontinental lithosphere (Fig. 3a2, 8.5 Myr).  
163 After ~10.2 Myr, combined effect of the increasing slab pull and asthenosphere upwelling promoted necking around the  
164 oceanic-procontinental lithospheric transition zone (Fig. 3a3, 11 Myr). The procontinental lithosphere then arrived at the  
165 trench and initiated subducting along the inclined weak zone, accommodating most of the ongoing convergence. During this  
166 stage, the continuous compression and rebound after slab break-off significantly uplifted the collision zone. Later on, the  
167 upper part of the retrocontinental lithosphere indented into the procrust, scraping off most of the procontinental upper crust,  
168 causing significant thickening and localized shear zones there while leaving the residual little portion to subduct with the  
169 lithosphere. Subsequently, the accumulated orogenic wedge gradually grew into a relative wide surface uplift.



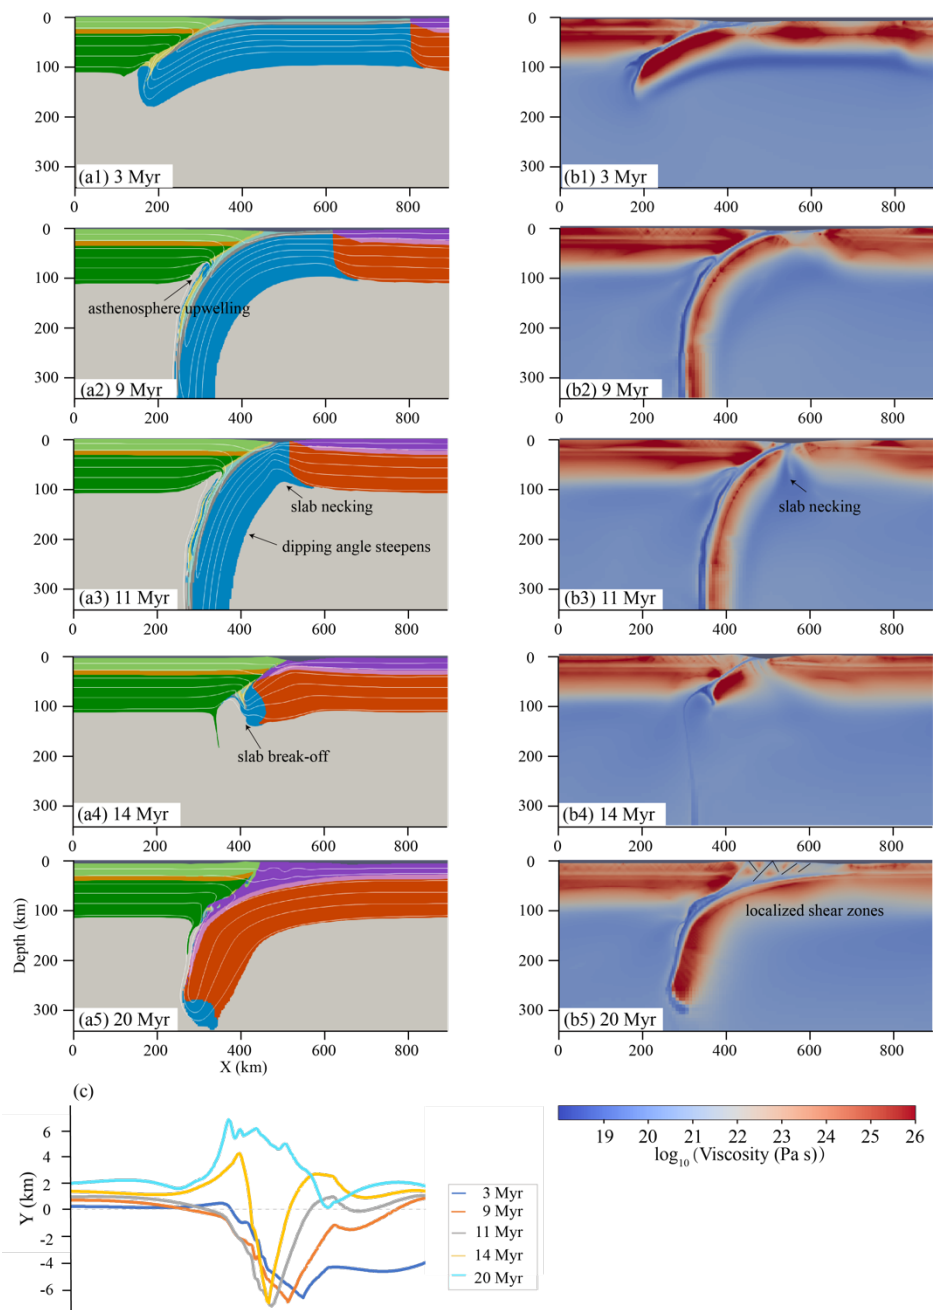

170

171 **Figure 3.** Results of Model m7. Snapshots of compositional fields (a1 - a5), viscosity (b1 - b5) and topography (c) for  
 172 selected model times are shown. The lithologies and isotherms are the same as in Fig. 1.

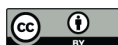

173 **3.3 Sensitivity tests of lithospheric thermal structure on the evolution of continental convergence**

174 A regime diagram (Fig. 4) of all the models summarizes the template simulations investigating the effects of  
 175 continental  $T_{\text{moho}}$  and  $H_r$ , and two contrasting end members of continental collision modes are identified. Models with a cold  
 176 procontinental  $T_{\text{moho}}$  ( $\leq 450$  °C) generally exhibit a continuous subduction mode without slab break-off. Meanwhile, the  
 177 hotter the retrocontinental  $T_{\text{moho}}$ , the steeper the subducting angle is (Figs. 4a, 5a). In comparison, Mode II dominates among  
 178 the models with a relative hot procontinental  $T_{\text{moho}}$  ( $\geq 500$  °C), especially when the retrocontinental  $T_{\text{moho}}$  is greater than  
 179  $550$  °C (Fig. 4a). In addition,  $H_r$  is a second-order controlling parameter compared to the  $T_{\text{moho}}$ , as it's more propensity to  
 180 alter the upper part of lithospheric deformation styles than the continental collision mode (Figs. 6c - 6i).

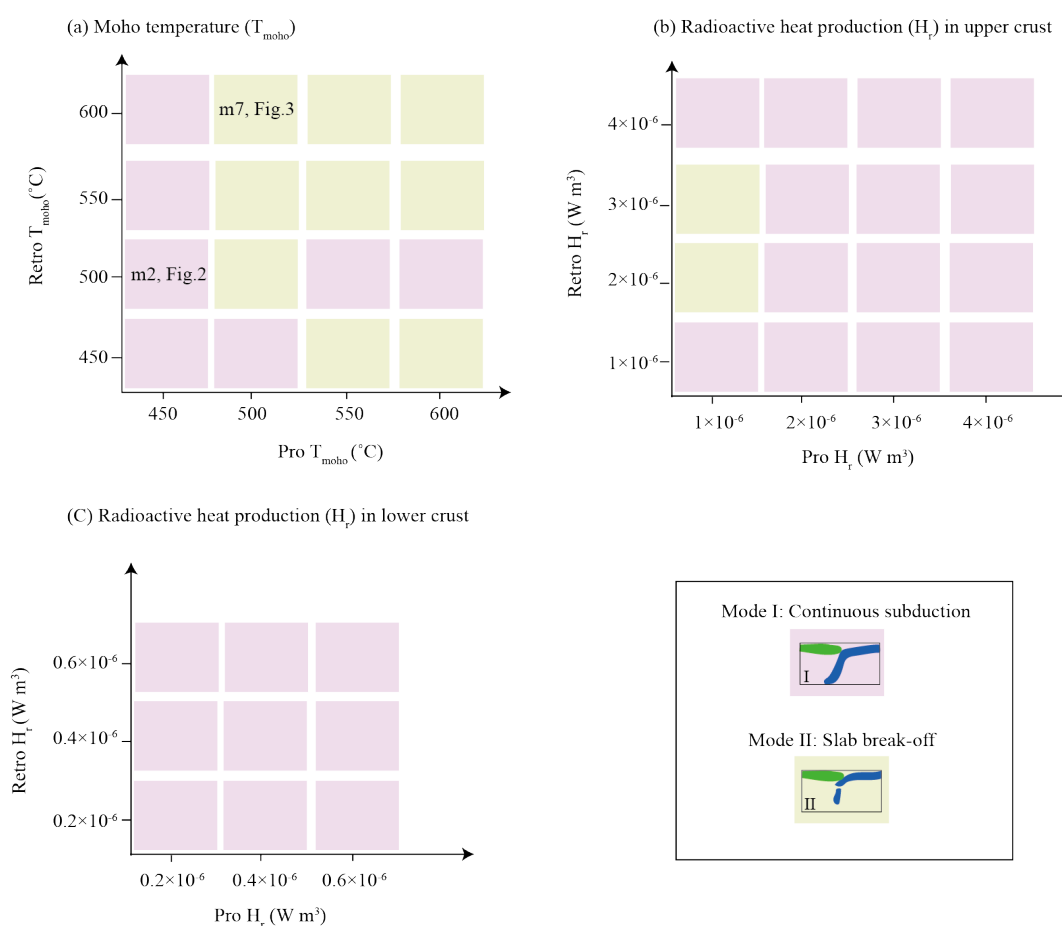

181  
 182 **Figure 4.** Schematic figures of models with different (a) continental  $T_{\text{moho}}$ , (b) upper and (c) lower crustal radioactive heat  
 183 production (Table S2). The diagram in each panel shows the dependence of collision mode on the corresponding controlling  
 184 parameters of both colliding plates.

185



## 186 4 Discussions

### 187 4.1 How continental moho temperature influences the trajectory of the collision system?

188 As mentioned above, models incorporating a cold prolithosphere generally evolve into continuous subduction  
189 without slab break-off. It may come from the fact that a cold prolithosphere is strong enough to maintain its strength, and  
190 also keeps coupling with the retrolithosphere during plate convergence. Thus, the prolithosphere suffers moderate roll-back,  
191 under the condition that the stress is not sufficient to yield the lithosphere and generate break-off (Fig. 2, Fig. S1 in  
192 Supporting Information). Based on further analysis of this mode of models, we notice that the subducting angle increases as  
193 the retrocontinental  $T_{\text{moho}}$  increases, accompanied by much more procrust accumulation at shallow and intense  
194 retrolithospheric mantle destruction (Figs. 5a - 5d). The mechanism behind this is that increasing the retrocontinental  $T_{\text{moho}}$   
195 can weaken the retrolithosphere and increase the thermal structural difference between the two continents, which may lead to  
196 plate decoupling. As a consequence, it is more likely for the prolithosphere to roll back as the magnitude of decoupling  
197 increases. Besides, weakening of the retrolithosphere may also offer a favorable condition for the intrusion of accumulated  
198 procrustal material into it.

199 As to mode II, models with hot procontinental  $T_{\text{moho}} (\geq 500^\circ\text{C})$  always evolve into continental subduction following  
200 a slab break-off. In these cases, when the retrocontinental  $T_{\text{moho}}$  is defined, the time for the slab break-off increases as the  
201 procontinental  $T_{\text{moho}}$  decreases (Fig. 5e). We perceive that the plates decoupling also enhances when retro  $T_{\text{moho}}$  increases, as  
202 shown in mode I. The hotter the procontinent, the weaker and easier it is to break. As a result of ongoing subduction, the slab  
203 rolls back rapidly, which may generate a gap between the adjacent plates. The asthenosphere then upwells into it, and in turn  
204 aggravates the roll-back. This contributes to the development of intense strain localization in the prolithosphere and finally  
205 leads to slab break-off (Figs. 3, S2, 5f, 5g, 5h).

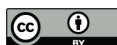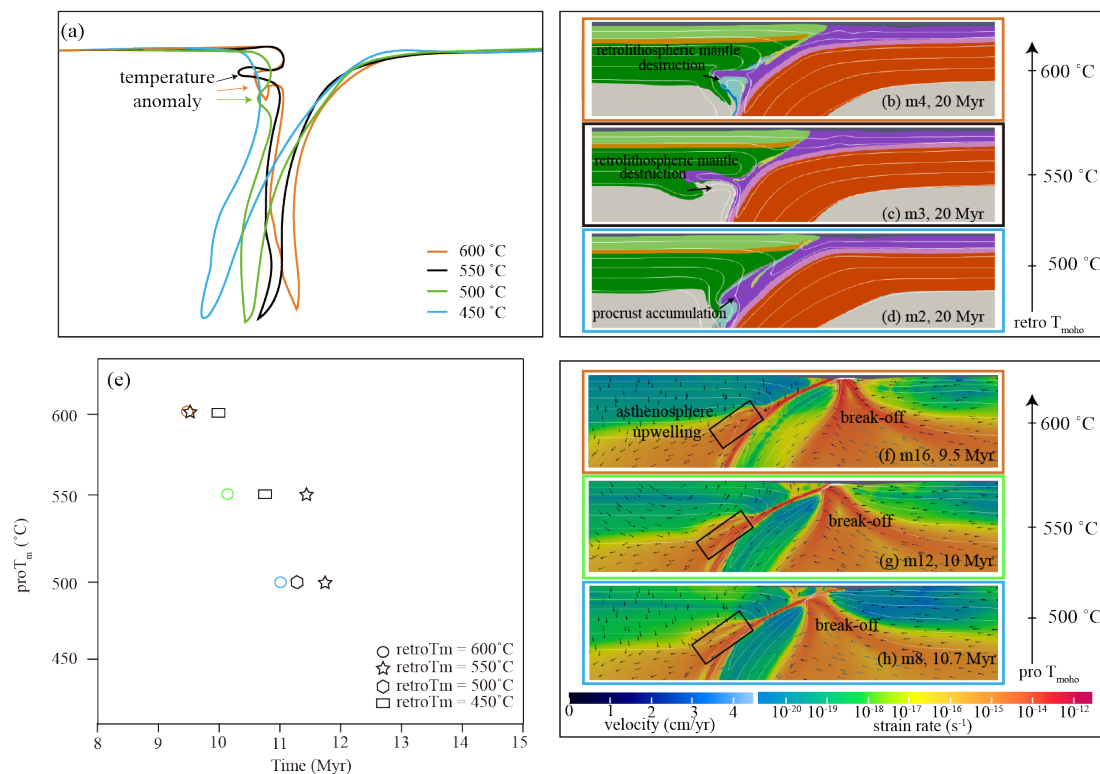

206

207 **Figure 5.** (a) Geometries of subducting plate in models with different retrocontinental  $T_{\text{moho}}$ . Compositional fields of models  
 208 with decreasing retrocontinental  $T_{\text{moho}}$ , (b) m4,  $T_{\text{moho}} = 600^\circ\text{C}$ , (c) m12,  $T_{\text{moho}} = 550^\circ\text{C}$ , (d) m8,  $T_{\text{moho}} = 500^\circ\text{C}$ . White lines  
 209 denote the isotherms (200 °C increments). (e) shows the relationship between the times of slab break-off and continental  
 210  $T_{\text{moho}}$ . (f)-(h) are strain rate of models with various procontinental  $T_{\text{moho}}$ .

#### 211 4.2 How crustal radioactive heat production influences the trajectory of the collision system

212 Radioactive elements are thought to mainly exist in the continental crust, and the radioactive heat production that  
 213 originates from their decay is one of the important internal heat sources in the earth, which influences the continental  
 214 lithospheric thermal structure significantly (Turcotte and Schubert, 2002; Faccenda et al., 2008). According to our model  
 215 results, increasing the upper crustal  $H_r$  can distinctly increase the thermal gradient of the lithospheric upper part, under the  
 216 effect of which the steep surface topography built at the early stage of continental collision would tend to be relatively gentle.  
 217 In comparison, varying lower crustal  $H_r$  has much less influence on the variation of the lithospheric thermal gradient and the  
 218 evolution of surface topography. Moreover, as the  $H_r$  in the crust increases, the lithospheric rheological strength decreases,  
 219 which facilitates the growth of crustal shear zones. That is, the higher the crustal  $H_r$ , the more shear zones it may generate in  
 220 the crust (Figs. 6c - 6i). In conclusion, crustal  $H_r$  is a crucial parameter in enhancing strain localization in the lithospheric



221 upper part that is closely related to the growth of shear zones, while it exerts a second-order influence on altering the  
 222 continental collision mode.

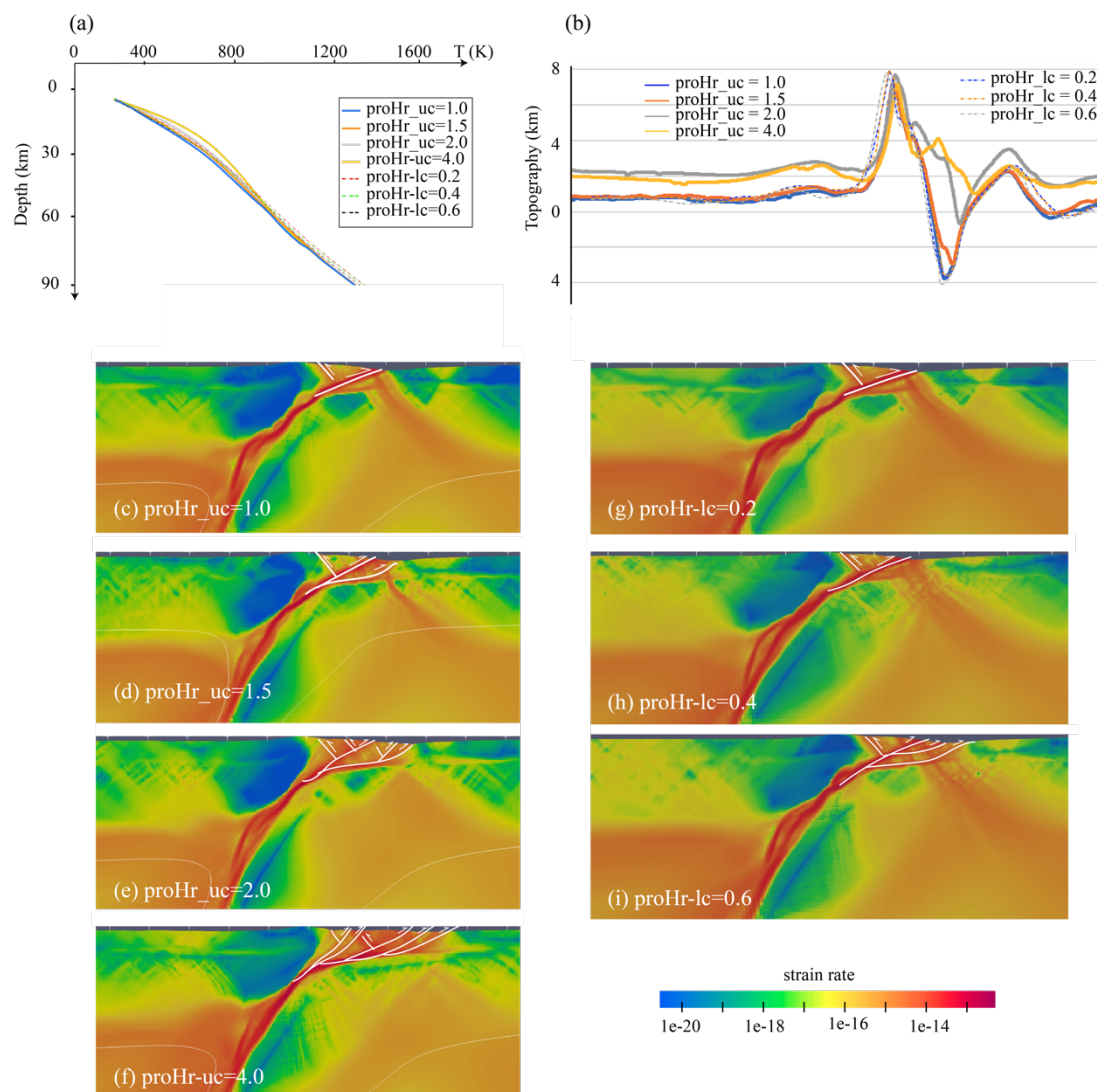

223  
 224 **Figure 6.** Temperature profiles (a), topography (b) and strain rate (c-i, at 20 Myr) of models with different crustal H.  
 225

226 **4.3 Implications on the development of lateral heterogeneous of Indian-Asian collision**

227 ~2000 km-long east-west Himalayan-Tibetan orogenic system was created by continental collision from ~ 60 to 50  
 228 Ma, with the Nanga Parbat syntaxis as its west margin and the Namche Barwa syntaxis in the east (Chen et al., 2015). It has  
 229 been proven by contrasting along-strike lithospheric structures (Li et al., 2008; Chen et al., 2015; Kufner et al., 2021). By



230 comparison, our models are capable of providing several first-order fits of the crust-mantle deformation behaviors to this  
231 natural collision system, especially at the Hindu-Kush profile and the eastern Tibet profile.

232 Hindu Kush is the westernmost ~~extend~~ of the Himalayan-Tibetan orogen. Previous seismic tomography studies have  
233 confirmed that there is a north-dipping, downward steepening, and thinning high-velocity anomaly (HVA), accompanied by  
234 increasingly intense seismicity, underneath the region (Kufner et al., 2016; Kufner et al., 2021). The inclined HVA is  
235 believed to be a subducting plate of Indian provenance and is part of the Indian-Asian collision system. The thinning of the  
236 HVA is in the extent between 180-220 km, and was suggested to be at the transition zone between Indian continental  
237 lithosphere and Neo-Tethys oceanic lithosphere. In agreement with the observations, Model m2 has a similar tectonic  
238 background, and shows an analogous continuous subduction characterized by a nearly vertical dipping angle and a slab  
239 necking at a depth of  $\sim 220$  km. In addition, the relative narrow collision orogen in the model is also consistent with the  
240 natural topography in this region (Figs. 7a, 2c). It's worth noticing that the observed inclined distribution of earthquakes  
241 seems to coincide with the subducting continental crust. This may offer a possible explanation for the active intermediate  
242 earthquakes beneath this region.

243 The main part of the Himalayan-Tibetan orogen is the product of a collision between the cold Indian craton and the  
244 relative warm Asian continent after the closure of Neo-Tethys, the geological settings of which are quite analogous with our  
245 Model m7. During the continental collision phase, the Yarlung Zangbo suture zone bordering the Indian and Asian  
246 lithospheres moved significantly, creating an  $\sim 8$  km mountain (the Himalayas) and a  $\sim 4$  km plateau (the Tibetan Plateau)  
247 (Yin and Harrison, 2000). Unlike continuous subduction underlying the Hindu Kush, geological and seismological evidence  
248 shows that the eastern part of the profile is underlain by a shallower-angle subducting Indian lithosphere following a slab  
249 break-off; these are also similar to the model results of Model m7 (Figs. 7b, 2c). Furthermore, previous field observations  
250 have shown that the northern part of the Indian continental crust is abundant with radioactive elements (Vidal et al., 1982;  
251 Scaillet et al., 1990; Macfarlane, 1992; Faccenda et al., 2008). Our sensitive tests have recognized that continental crust with  
252 high radioactive heat production is much easier to generate brittle fractures and intense deformation of the lithospheric upper  
253 part, which may lead to the development of new shear zones (Fig. 6). This resembles the tectonic characteristics of large  
254 thrust fault zones in the Himalayas (Fig. 7b).

255 In consequence, we speculate that the lithospheric thermal structural difference may be one of the key parameters that  
256 control the evolution of lateral heterogeneity along the Himalayan-Tibetan orogen and that the high content of crustal  
257 radioactive elements is one of the significant factors that dominates the growth of large thrust fault zones in the Himalayas.



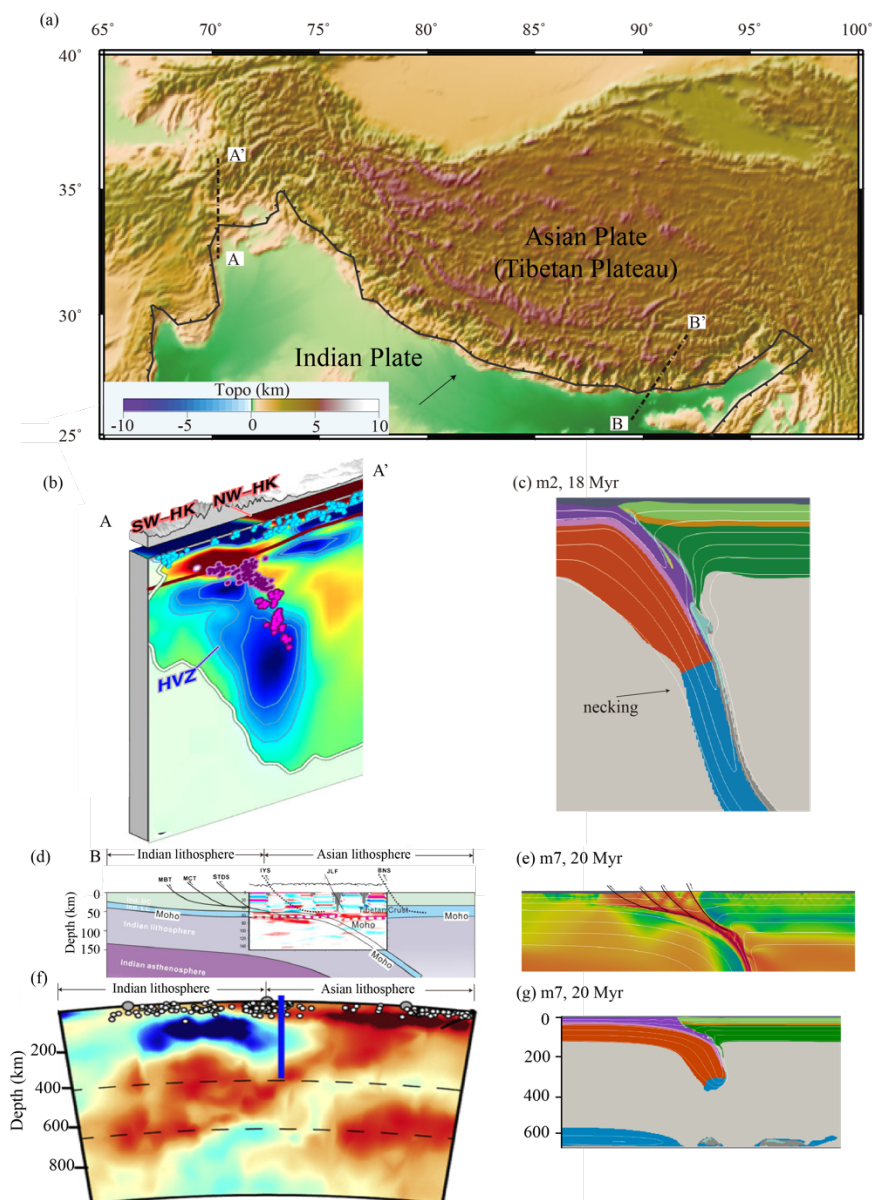

258

259 **Figure 7.** (a) Geographic setting of Himalayan-Tibetan orogen. Schematic geologic cross-sections across the (b) western  
260 (Hindu Kush) (Kufner et al., 2021) and eastern Himalayan-Tibetan orogen (Li et al., 2008; Wang et al., 2019). (c) shows the  
261 compositional field of Model m2 (mode I), (e) and (g) are the strain rate and compositional field of Model m7 (mode II),  
262 respectively.

263

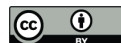

## 264 5 Conclusions

265 In this work, we systematically discuss the influences of the lithospheric thermal structure on the evolution of the  
266 continental collision system based on high-resolution thermomechanical numerical experiments. The model results  
267 demonstrate that:

268 Two end members of continental collision are obtained: the continuous subduction mainly occurs with a relative cold  
269 overriding lithosphere ( $T_{\text{moho}} \leq 450^\circ$ ), and as the retrocontinental  $T_{\text{moho}}$  increases, the subducting angle steepens. Slab break-  
270 off dominates when the model has a relative hot procontinental  $T_{\text{moho}} (\geq 500^\circ\text{C})$ , especially when the retrocontinental  $T_{\text{moho}}$   
271 is greater than  $550^\circ\text{C}$ .  $H_r$  is a second-order controlling parameter compared with  $T_{\text{moho}}$  in shaping the continental collision  
272 mode, while it is more prone to facilitate the growth of crustal shear zones.

273 The lithospheric thermal structure may have played a significant role in the development of lateral heterogeneity along  
274 the Himalayan-Tibetan orogenic belt. We suggest that the different evolutionary paths between the continuous subduction  
275 underlying the Hindu Kush and the continental subduction beneath eastern Tibet may come from the inherited lateral  
276 inhomogeneous of the Indian lithospheric geothermal gradient. In addition, the high content of radioactive elements in the  
277 continental crust may be one of the important reasons for the development of deep and large thrust fault zones in this  
278 collision orogen.

279  
280 *Data availability.* The input files of ASPECT are available at the Open Science Framework repository with  
281 <https://doi.org/10.5281/zenodo.8076545>.

282  
283 *Competing interests.* The authors declare that they have no conflict of interest.

284  
285 *Author contributions.* MXL and DHY designed and oversaw the project. MXL performed all the numerical simulations. R.Q.  
286 participated in the discussions and paper revisions. All authors contributed to the manuscript writing.

287  
288 *Acknowledgment.* This work is supported by the National Natural Science Foundation of China (Grant Nos. 42104097,  
289 U1839206). The figures in this paper are produced by the Paraview V5.11.1, Generic Mapping Tools V5.4.2 (Wessel et al.,  
290 2013), Python V3.6.7, and Adobe Illustrator. We thank the Computational Infrastructure for Geodynamics for supporting the  
291 development of ASPECT (<https://aspect.geodynamics.org>). ASPECT (version 2.4.0-pre) we used in this paper is built on the  
292 open-source finite element package deal. II (version 10.0.0-pre) through the candi installation package  
293 (<https://github.com/dealii/candi>). Additional dependencies include Trilinos (13.0.0) and p4est (2.2.0). All the numerical  
294 models were run on the TianHe-1A cluster at National Supercomputer Center in Tianjin.





## 295 References

- 296 Arndt, D., Bangerth, W., Blais, B., Fehling, M., Gassmöller, R., Heister, T., Heltai, L., Köcher, U., Kronbichler, M., Maier,  
297 M., Munch, P., Pelteret, J.-P., Proell, S., Simon, K., Turcksin, B., Wells, D., and Zhang, J.: The deal.II library, Version  
298 9.3. *J. Numer. Math.*, 29 (3), 171-186, <https://doi.org/10.1515/jnma-2021-0081>, 2021.
- 299 Beaumont, C., Fullsack, P., and Hamilton, J.: Styles of crustal deformation in compressional orogens caused by subduction  
300 of the underlying lithosphere. *Tectonophysics*, 232, 119-132, [https://doi.org/10.1016/0040-1951\(94\)90079-5](https://doi.org/10.1016/0040-1951(94)90079-5), 1994.
- 301 Chapman, D.S.: Thermal gradients in the continental crust. Geological Society, London, Special Publications 24, 63-70,  
302 <https://doi.org/10.1144/GSL.SP.1986.024.01.0>, 1986.
- 303 Chen, L., and T. V. Gerya.: The role of lateral lithospheric strength heterogeneities in orogenic plateau growth: Insights from  
304 3-D thermo-mechanical modeling. *J. geophys. Res.: Solid Earth*, 121(4), 3118-3138,  
305 <https://doi.org/10.1002/2016JB012872>, 2016.
- 306 Chen, Y., L. W., Yuan, X. H., Badal, J., and Teng, J. W.: Tearing of the Indian lithospheric slab beneath southern Tibet  
307 revealed by SKS-wave splitting measurements. *Earth Planet. Sci. Lett.*, 413: 13-24,  
308 <https://doi.org/10.1016/j.epsl.2014.12.041>, 2015.
- 309 Davis, R.O., and Selvadurai, A.P.S.: *Plasticity and Geomechanics*. Cambridge University Press, Cambridge, 2002.
- 310 Faccenda, M., Gerya, T.V., and Chakraborty, S.: Styles of post-subduction collisional orogeny: Influence of convergence  
311 velocity, crustal rheology and radiogenic heat production. *Lithos*, 103, 257-287,  
312 <https://doi.org/10.1016/j.lithos.2007.09.009>, 2008.
- 313 Ghazian, R.K., and Buter, S.J.H.: A numerical investigation of continental collision styles. *Geophys. J. Int.*, 193, 1133-1152,  
314 <https://doi.org/10.1093/gji/ggt068>, 2013.
- 315 Gleason, G.C., and Tullis, J.: A flow law for dislocation creep of quartz aggregates determined with the molten salt cell.  
316 *Tectonophysics* 247, 1-23, [https://doi.org/10.1016/0040-1951\(95\)00011-B](https://doi.org/10.1016/0040-1951(95)00011-B), 1995.
- 317 Glerum, A., Thieulot, C., Fraters, M., Blom, C., and Spakman, W.: Nonlinear viscoplasticity in ASPECT: benchmarking and  
318 applications to subduction. *Solid Earth*, 9, 267-294, <https://doi.org/10.5194/se-9-267-2018>, 2018.
- 319 Heron, P.J., and Pysklywec, R.N.: Inherited structure and coupled crust-mantle lithosphere evolution: Numerical models of  
320 Central Australia. *Geophys. Res. Lett.*, 43, 4962-4970, <https://doi.org/10.1002/2016GL068562>, 2016.
- 321 Hirth, G., and Kohlstedt, D.: Rheology of the upper mantle and the mantle wedge: A view from the experimentalists.  
322 Washington DC American Geophysical Union Geophysical Monograph Series, 138, 83-105,  
323 <https://doi.org/10.1029/138GM06>, 2003.
- 324 Huangfu, P., Li, Z.H., Fan, W., and Shi, Y.: Dynamics of crustal overthrust versus underthrust in the continental collision  
325 zones: Numerical modelling. *Terra Nova*, 31, 332-342, <https://doi.org/10.1111/ter.12384>, 2019.
- 326 Huangfu, P., Wang, Y., Fan, W., Li, Z., and Zhou, Y.: Dynamics of unstable continental subduction: Insights from numerical  
327 modeling. *Sci. China. Earth. Sci.*, 60, 218-234, <https://doi.org/10.1007/s11430-016-5014-6>, 2017.



- 328 Karato, S.-i., and Wu, P.: Rheology of the upper mantle: A synthesis. *Science*, 260, 771-778,  
329 <https://doi.org/10.1126/science.260.5109.771>, 1993.
- 330 Karato, S.-i.: *Deformation of Earth Materials: An Introduction to the Rheology of Solid Earth*. Cambridge University Press,  
331 Cambridge, 2008.
- 332 Kronbichler, M., Heister, T., and Bangerth, W.: High accuracy mantle convection simulation through modern numerical  
333 methods. *Geophys. J. Int.*, 191, 12-29, <https://doi.org/10.1111/j.1365-246X.2012.05609.x>, 2012.
- 334 Kufner, S. K., Kakar, N., Bezada, M., Bloch, W., and Schurr, B.: The Hindu Kush slab break-off as revealed by deep  
335 structure and crustal deformation. *Nature Communications*, 12: 1685, <https://doi.org/10.1038/s41467-021-21760-w>,  
336 2021.
- 337 Kufner S. K., Schurr, B., Sippl, C., Yuan, X. H., Ratschbacher, L., Akbar, A. M., Ischuk, A., Murodkulov, S., Schneider, F.,  
338 Mechie, J., and Tilmann, F.: Deep india meets deep asia: lithospheric indentation, delamination and break-off under  
339 pamir and hindu kush (central asia). *Earth Planet. Sci. Lett.*, 435, 171-184, <https://doi.org/10.1016/j.epsl.2015.11.046>,  
340 2016.
- 341 Li, C., van der Hilst, R. D., Meltzer, A. S., and Engdahl, E. R.: Subduction of the Indian lithosphere beneath the Tibetan  
342 Plateau and Burma. *Earth Planet. Sci. Lett.* 274, 157–168, <https://doi.org/10.1016/j.epsl.2008.07.016>, 2008.
- 343 Liao, J., and Gerya, T.: Partitioning of crustal shortening during continental collision: 2-D thermomechanical modeling. *J.*  
344 *geophys. Res.*, 122, 592-606, <https://doi.org/10.1002/2016JB013398>, 2017.
- 345 Liu, M., and Yang, D. H.: How do pre-existing weak zones and rheological layering of the continental lithosphere influence  
346 the development and evolution of intra-continental subduction? *J. Asian. Earth. Sci.*, 238, 105385,  
347 <https://doi.org/10.1016/j.jseaes.2022.105385>, 2022.
- 348 Liu, M., Yang, D. H., and Huangfu, P. P.: Effects of plate velocity slowdown on altering continental collision patterns and  
349 crustal-lithospheric deformation during the collision process. *Front. Earth Sci.*, 10: 814710,  
350 <https://doi.org/10.3389/feart.2022.814710>, 2022a.
- 351 Liu, S., Sobolev, S.V., Babeyko, A.Y., and Pons, M.: Controls of the foreland deformation pattern in the orogen-foreland  
352 shortening system: constraints from high-resolution geodynamic models. *Tectonics*, 41, e2021TC007121,  
353 <https://doi.org/10.1029/2021TC007121>, 2022b.
- 354 Luth, S., Willingshofer, E., Sokoutis, D., and Cloetingh, S.: Analogue modelling of continental collision: Influence of plate  
355 coupling on mantle lithosphere subduction, crustal deformation and surface topography. *Tectonophysics*, 484, 87-102,  
356 <https://doi.org/10.1016/j.tecto.2009.08.043>, 2010.
- 357 Macfarlane, A.M.: *The tectonic evolution of the core of the Himalaya, Langtang National Park, central Nepal*. Massachusetts  
358 Institute of Technology, 1992.
- 359 Pysklywec, R.N.: Evolution of subducting mantle lithosphere at a continental plate boundary. *Geophys. Res. Lett.*, 28, 4399-  
360 4402, <https://doi.org/10.1029/2001GL013567>, 2001.

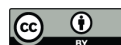

- 361 Rybacki, E., Gottschalk, M., Wirth, R., and Dresen, G.: Influence of water fugacity and activation volume on the flow  
362 properties of fine-grained anorthite aggregates. *J. geophys. Res.*, 111, B03203, <https://doi.org/10.1029/2005JB003663>,  
363 2006.
- 364 Scaillet, B., France-Lanord, C., and Le Fort, P.: Badrinath-Gangotri plutons (Garhwal, India): petrological and geochemical  
365 evidence for fractionation processes in a high Himalayan leucogranite. *J. Volcanol. Geoth. Res.*, 44, 163-188,  
366 [https://doi.org/10.1016/0377-0273\(90\)90017-A](https://doi.org/10.1016/0377-0273(90)90017-A), 1990.
- 367 Tang, J., Chen, L., Meng, Q., and Wu, G.: The effects of the thermal state of overriding continental plate on subduction  
368 dynamics: Two-dimensional thermal-mechanical modeling. *Sci. China. Earth., Sci.*, 63, 1519-1539,  
369 <https://doi.org/10.1007/s11430-019-9624-1>, 2020.
- 370 Toussaint, G., Burov, E., and Jolivet, L.: Continental plate collision: Unstable vs. stable slab dynamics. *Geology*, 32, 33-36,  
371 <https://doi.org/10.1130/G19883.1>, 2004.
- 372 Turcotte, D.L., and Schubert, G.: *Geodynamics*. Cambridge university press. 2002
- 373 Ueda, K., Gerya, T.V., and Burg, J.-P.: Delamination in collisional orogens: Thermomechanical modeling. *J. geophys. Res.*,  
374 117, B08202, <https://doi.org/10.1029/2012JB009144>, 2012.
- 375 van Zelst, I., F. Cramer, A. E. Pusok, A. Glerum, J. Dannberg, and C. Thieulot.: 101 geodynamic modelling: how to design,  
376 interpret, and communicate numerical studies of the solid Earth, *Solid Earth*, 13(3), 583-637, [https://doi.org/10.5194/se-](https://doi.org/10.5194/se-13-583-2022)  
377 13-583-2022, 2022.
- 378 Vidal, P., Cocherie, A., and Fort, P.L.: Geochemical investigations of the origin of the Manaslu leucogranite (Himalaya,  
379 Nepal). *Geochim. Cosmochim. Ac.*, 46, 2279-2292, [https://doi.org/10.1016/0016-7037\(82\)90201-0](https://doi.org/10.1016/0016-7037(82)90201-0), 1982.
- 380 Vogt, K., Willingshofer, E., Matenco, L., Sokoutis, D., Gerya, T., and Cloetingh, S.: The role of lateral strength contrasts in  
381 orogenesis: A 2D numerical study. *Tectonophysics*, 746, 549-561, <https://doi.org/10.1016/j.tecto.2017.08.010>, 2018.
- 382 Wang, C. Y., Mooney, W. D., Zhu, L., Wang, X., Lou, H., and You, H., Cao, Z., Chang, L., and Yao, Z.: Deep structure of  
383 the eastern himalayan collision zone: evidence for underthrusting and delamination in the postcollisional stage.  
384 *Tectonics*, 38,3614-3628, <https://doi.org/10.1029/2019TC005483>, 2019.
- 385 Wessel, P., Smith, W.H.F., Scharroo, R., Luis, J., and Wobbe, F.: Generic Mapping Tools: Improved Version Released. *Eos*,  
386 *Transactions American Geophysical Union*, 94, 409-410, <https://doi.org/10.1002/2013EO450001>, 2013.
- 387 Wilks, K.R., and Carter, N.L.: Rheology of some continental lower crustal rocks. *Tectonophysics*, 182, 57-77,  
388 [https://doi.org/10.1016/0040-1951\(90\)90342-6](https://doi.org/10.1016/0040-1951(90)90342-6), 1990.
- 389 Willingshofer, E., and Sokoutis, D.: Decoupling along plate boundaries: Key variable controlling the mode of deformation  
390 and the geometry of collisional mountain belts. *Geology*, 37, 39-42, <https://doi.org/10.1130/G25321A.1>, 2009.
- 391 Yin, A., and Harrison, T.M.: Geologic Evolution of the Himalayan–Tibetan Orogen. *Annu. Rev. Earth. Pl. Sc.*, 28, 211-280,  
392 2000
- 393 Zhou, H. W., and Murphy, M. A.: Tomographic evidence for wholesale underthrusting of india beneath the entire tibetan  
394 plateau. *J. Asian. Earth. Sci.*, 25(3), 445-457, <https://doi.org/10.1016/j.jseas.2004.04.007>, 2005.
